# Supplementary material for: Distinct effects of ASD and ADHD symptoms on reward anticipation in participants with ADHD, their unaffected siblings and healthy controls: a cross-sectional study
Source: PubMed Central journal article supplement (PMC4551566; doi:10.1186/s13229-015-0043-y), 2015-08-28
Supplement: 13229_2015_43_MOESM1_ESM.pdf [file 13229_2015_43_MOESM1_ESM.pdf]

## Additional File 1. Exclusion flowchart

| All NeuroIMAGE participants scanned using the MID paradigm                                                                                                                                                                                                                                                                                                                                                                                                                                                                                                                             | N=564                                                                                                                                                                        |
|----------------------------------------------------------------------------------------------------------------------------------------------------------------------------------------------------------------------------------------------------------------------------------------------------------------------------------------------------------------------------------------------------------------------------------------------------------------------------------------------------------------------------------------------------------------------------------------|------------------------------------------------------------------------------------------------------------------------------------------------------------------------------|
| <p><b>Exclusion of participants due to:</b></p> <p>Subthreshold, unconfirmed or remittent ADHD diagnosis<br/>           Incomplete MID data<br/>           Technical problems during data acquisition<br/>           Medication use during testing<br/>           Acute psychiatric conditions other than ADHD<br/>           Scientifically or clinically relevant incidental findings observed in MR data<br/>           Excessive motion during MRI recording<br/>           Insufficient number of MID trials<br/>           Incomplete CSBQ data</p> <p><b>Total excluded</b></p> | <p><b>N=63</b><br/> <b>N=17</b><br/> <b>N=22</b><br/> <b>N=8</b><br/> <b>N=4</b><br/> <b>N=11</b><br/> <b>N=16</b><br/> <b>N=82</b><br/> <b>N=17</b></p> <p><b>N=240</b></p> |
| <p><b>Total included</b></p> <p>A. Participants with a confirmed diagnosis of ADHD<br/>           B. Unaffected siblings of participants from Category A<br/>           C. Unrelated and unaffected control participants</p>                                                                                                                                                                                                                                                                                                                                                           | <p><b>N=324</b><br/> <b>N=136</b><br/> <b>N=83</b><br/> <b>N=105</b></p>                                                                                                     |
| <p><b>Subsample of participants included from the sample used by Von Rhein <i>et al.</i>, 2015</b></p> <p>A. Participants with a confirmed diagnosis of ADHD<br/>           B. Unaffected siblings of participants from Category A<br/>           C. Unrelated and unaffected control participants</p>                                                                                                                                                                                                                                                                                 | <p><b>91%*</b><br/> <b>90%*</b><br/> <b>97%*</b></p>                                                                                                                         |

\*Percentages represent percentage of sample used in Von Rhein *et al.* 2015 that could be included in the current analyses.
