# Supplementary material for: Distinct effects of ASD and ADHD symptoms on reward anticipation in participants with ADHD, their unaffected siblings and healthy controls: a cross-sectional study
Source: PubMed Central journal article supplement (PMC4551566; doi:10.1186/s13229-015-0043-y), 2015-08-28
Supplement: 13229_2015_43_MOESM7_ESM.pdf [file 13229_2015_43_MOESM7_ESM.pdf]

Additional File 7. Plots of ASD and ADHD effects in the three experimental groups

Effect of ASD Symptoms

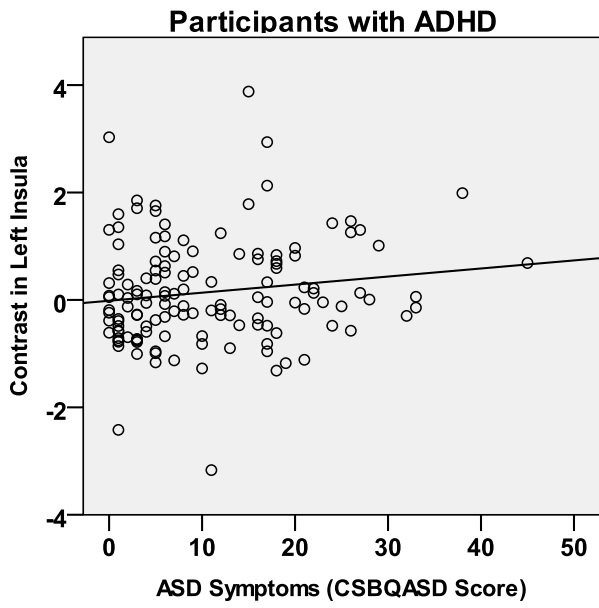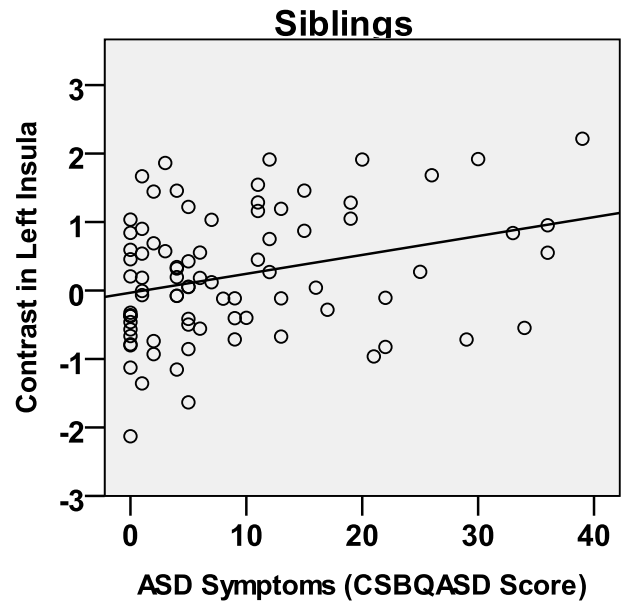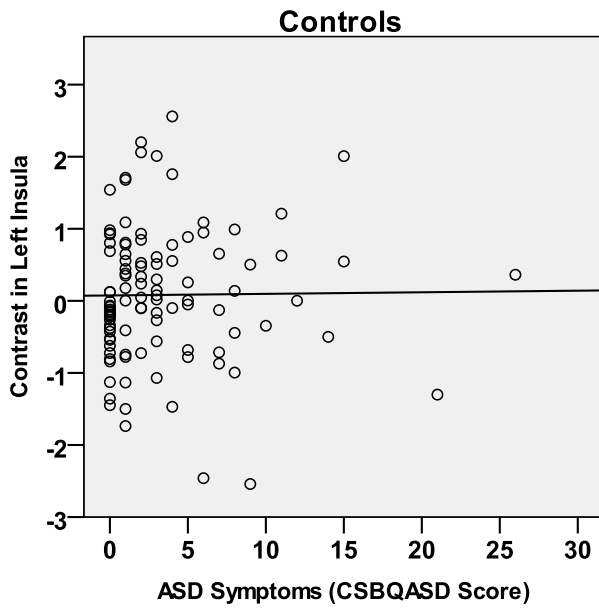

$R^2_{ADHD}=0.021$

$R^2_{SIBLINGS}=0.092$

$R^2_{CONTROLS}=0.001$

Effect of ADHD Symptoms

Participants with ADHD

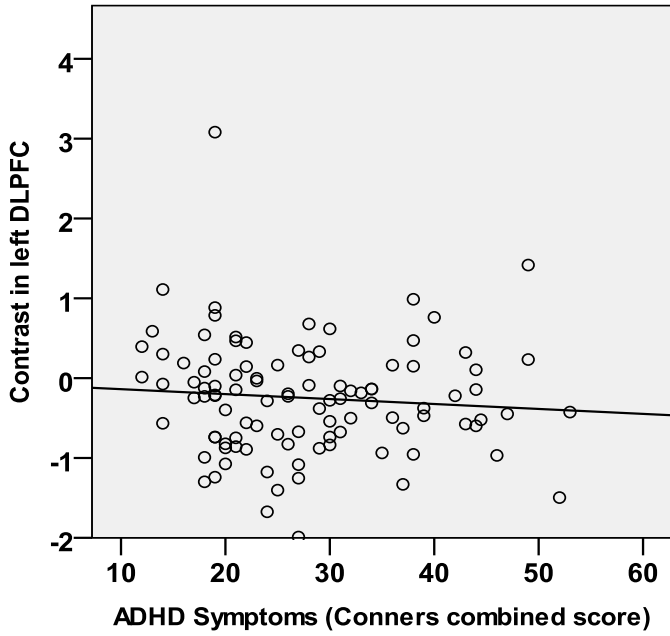

Siblings

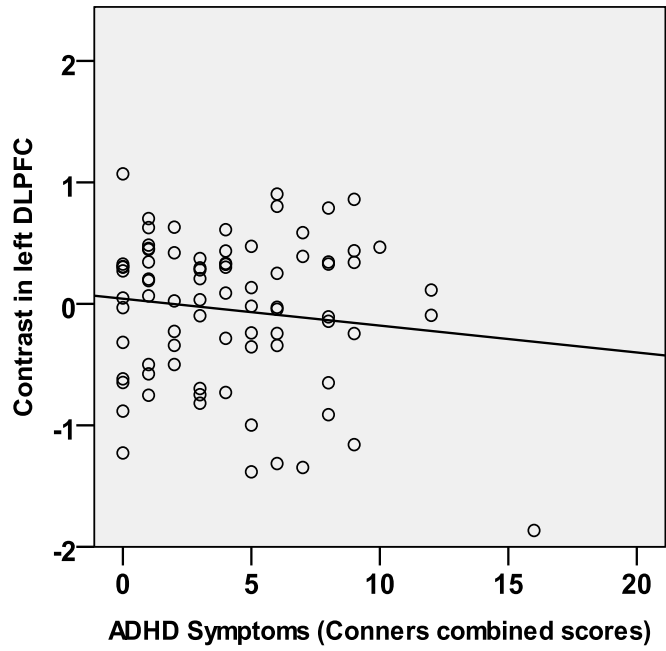

Controls

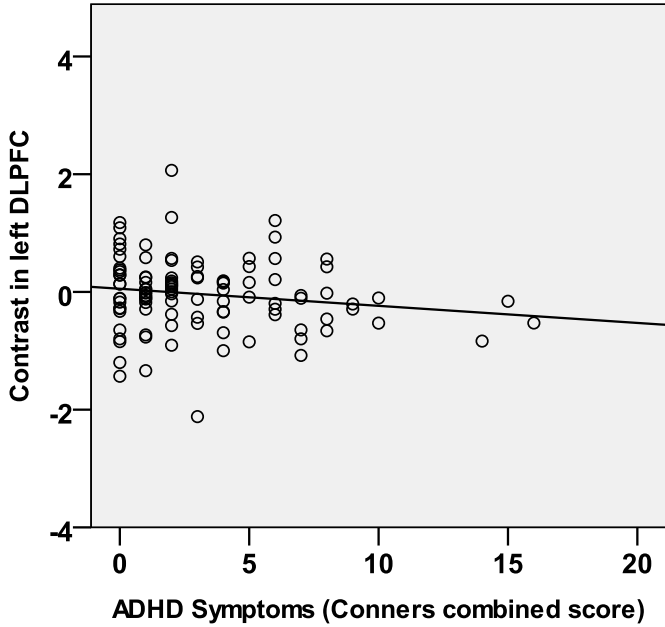

$R^2_{ADHD}=0.007$

$R^2_{SIBLINGS}=0.016$

$R^2_{CONTROLS}=0.026$
